# Supplementary material
Source: Springer Nature journal article supplement (https://www.springermedizin.de/resource/supplementary/12888_2012_1291_MOESM1_ESM.pdf/9479822)

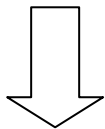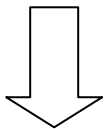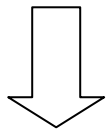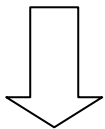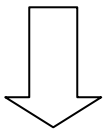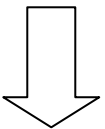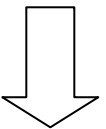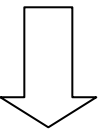

**Precursors**

**Consequences**

ATTITUDINAL PRECURSORS

People see me as an unfit parent

People are not understanding or sympathetic

**People have not appreciated what I need**

BARRIERS TO PARENTHOOD

I am stopped from having children

I am not allowed to see my children

RESOURCE CONSEQUENCES

I am not getting the support I need

CHILD-RELATED CONSEQUENCES

My children are affected

My children avoid me

INTERPERSONAL CONSEQUENCES

I am undermined as a parent

I am not listened to or taken seriously

My child's difficulties are blamed on my mental health problem

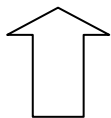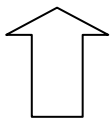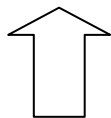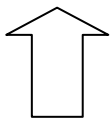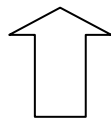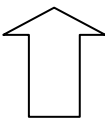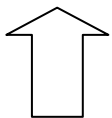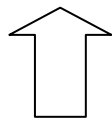

Supplement: MOESM1 [file 9479822]
